# Supplementary material
Source: Springer Nature journal article supplement (https://www.springermedizin.de/resource/supplementary/12967_2013_1734_MOESM8_ESM.pdf/9575138)

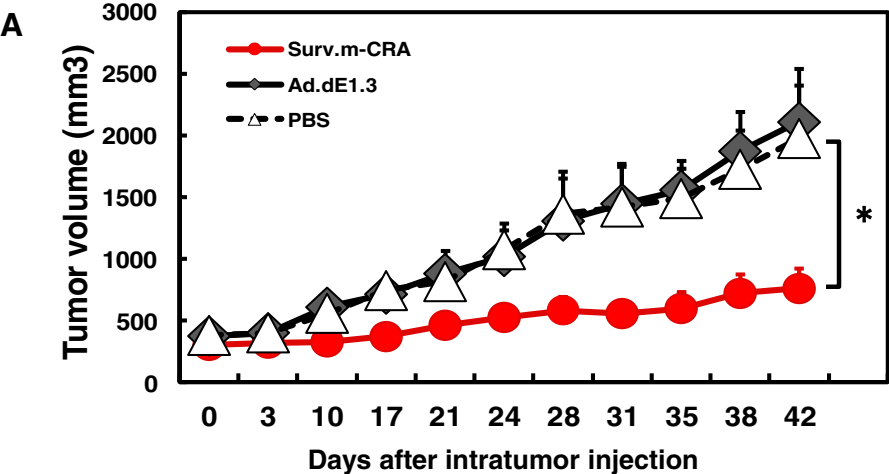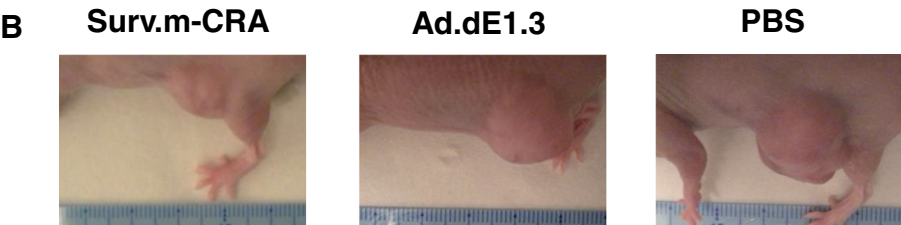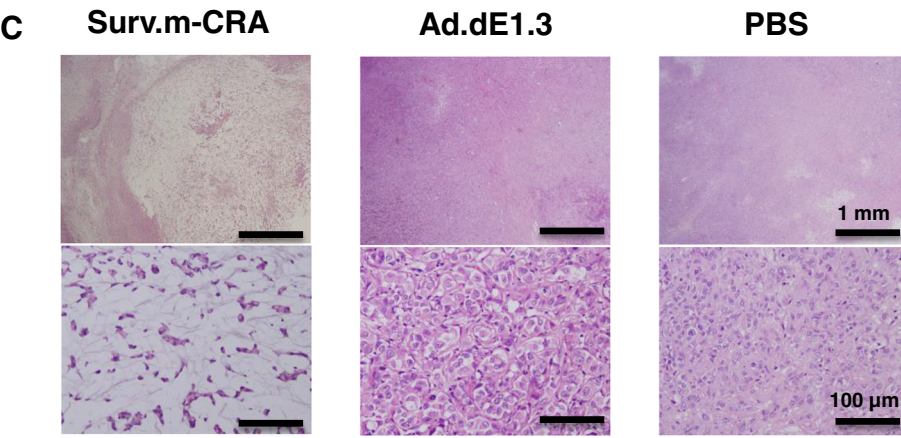

Supplement: MOESM8 [file 9575138]
